# Supplementary material for: Distinguishing STAT3/STAT5B-mutated large granular lymphocyte leukemia from myeloid neoplasms by genetic profiling
Source: PubMed Central journal article supplement — Blood Adv. 2022 Aug 10;7(1):40–5. doi: 10.1182/bloodadvances.2022008192 (PMC9813527; doi:10.1182/bloodadvances.2022008192), 2022-08-10
Supplement: BLOODA_ADV-2022-008192-mmc1.pdf [file BLOODA_ADV-2022-008192-mmc1.pdf]

## 1 **Supplementary Materials**

### 2 **Materials and Methods**

#### 3 **Case Selection and Data Collection**

4 A retrospective search of the pathology archives from January 2020 to October 2021 at the  
5 University of Utah, ARUP Laboratories, Oregon Health and Science University (OHSU),  
6 University of Kansas Medical Center (KUMC), and University of Pennsylvania (UPenn) was  
7 performed for cases with pathogenic or likely pathogenic variants in *STAT3* or *STAT5B* identified  
8 by NGS testing. 118 patients (65 with lymphoid, 50 with myeloid and 2 with composite neoplasms)  
9 with presumably somatic *STAT3* or *STAT5B* variants were identified in an unselected cohort of  
10 6690 patients with hematologic neoplasms (15% in 442 with lymphoid neoplasms and less than  
11 1% in 6248 with myeloid neoplasms). Cases were de-identified at the time of data collection.  
12 Concomitant variants limited to the common gene list (supplementary Table 1) were strictly used  
13 for further analysis. Patient demographic features, and clinical diagnosis were recorded for each  
14 case, and corresponding flow cytometric, cytogenetic, and T-cell clonality studies were further  
15 analyzed for correlation. Further, additional 18 age-matched MDS cases with T-LGL expansion  
16 were identified at the University of Utah and no *STAT3* or *STAT5B* variants were found by NGS  
17 in these cases. The study protocol was approved by the institutional review boards of these  
18 institutions and performed according to the Declaration of Helsinki.

#### 19 **Next Generation Sequencing**

20 DNA was extracted from fresh bone marrow aspirates and NGS testing was performed  
21 using a targeted NGS panel at each institution (Tab. S2). The ARUP myeloid malignancy NGS  
22 panel included 65 genes (all coding exons, Tab. S2) commonly mutated in MNs, and targeted  
23 hybrid-capture sequencing was performed using the SureselectXTHS kit (Agilent technologies,

24 Santa Clara, California) following the manufacturer's protocol. In brief, 1 µg of DNA was  
25 fragmented before library preparation using a Covaris E220 instrument (Covaris, Woburn).  
26 Adaptor ligated and molecular barcoded libraries were created, and solution hybridization was  
27 performed using pools of biotinylated RNA baits. Libraries were then pooled and sequenced on  
28 Illumina MiSeq. Alignment was performed using Burrows-Wheeler Aligner (BWA-MEM), with  
29 further analysis performed using GATK (version 3), VarScan2, and SNNPET (Agilent  
30 Technologies). For all samples, callers were run with default settings in individual sample analysis  
31 modes. To call a mutation, 20 × coverage of the base analyzed (as defined by the mutation caller)  
32 was required as well as coverage in both the forward and reverse directions. Annotation of variants  
33 was performed using SureCall (version 3.5.1.46; Agilent Technologies). Additionally, variants  
34 were curated using the Genome Aggregation Database (gnomAD), Exome Aggregation  
35 Consortium (EXAC), Exome Variant Server (EVS), Catalogue of Somatic Mutations in Cancer  
36 (COSMIC), and Human Gene Mutation Database (HGMD). The shared genes tested and genes  
37 listed in NGS panels at each institution were summarized in supplementary tables 1 and 2. All  
38 genes listed in each institution were sequenced with coverage of all coding exons for all  
39 institutions.

#### 40 **T-Cell Clonality By PCR**

41 DNA was extracted as described above, followed by PCR and fragment analysis according  
42 to the BIOMED-2 multiplex PCR protocol, which was validated for clinical use at ARUP  
43 laboratories.<sup>1,2</sup> Any peak more than 2 x higher than the maximal height of the polyclonal  
44 background was considered clonal. Any reactions with three or more clonal peaks were considered  
45 oligoclonal.<sup>1,2</sup>

#### 46 **Diagnostic Criteria of T/NK LGLL and T-LGL Expansion in Myeloid Neoplasms**

47 Flow cytometric, cytogenetic studies and myeloid malignancy panel by NGS panel were  
48 performed as parts of the standard protocol for myeloid neoplasm workup at ARUP Laboratories.  
49 At least 3 of 5 criteria<sup>3</sup> were required for diagnosis of T-LGLL with *STAT3/STA5B* variants: (a)  
50 presence of more than 500/ $\mu$ L T or NK-LGL in peripheral blood for more than 6 months;<sup>4</sup> (b)  
51 presence of abnormal cytotoxic T lymphocytes with an LGL phenotype expressing CD2, CD3,  
52 CD8, CD56 or CD16 or CD57 lacking or with diminished CD5;<sup>5</sup> (c) clonal TCR gene  
53 rearrangement by PCR; (d) characteristic LGL infiltrate in bone marrow;<sup>6</sup> (e) cytopenia (anemia  
54 or neutropenia) excluding other etiologies. Similar criteria were applied to the diagnosis of NK-  
55 LGLL with exceptions of aberrant NK cell phenotype by flow cytometry<sup>7</sup> and exclusion of clonal  
56 T-cells by germline configuration of TCR gene rearrangement by PCR. 18 MDS cases (patients  
57 #119 -136 in Tab. S3) with T-LGL clonal expansion were defined as a clone of given size with  
58 expression of LGL phenotype (commonly CD3+/ CD8+/CD57+ and/or CD16+ without apparent  
59 aberrancies) by flow cytometry that met the following criteria at the time of MDS diagnosis: (i)  
60 CD4/CD8 ratio less than 1; (ii) LGL T-cells more than 30% of total T-cells; (iii) LGL T-cells more  
61 than 10% of total leukocytes. The mean absolute LGL clone size was 289 cells/ $\mu$ L, less than those  
62 with an LGLL diagnosis ( $P < 0.05$ ).<sup>3,8</sup>

### 63 **Statistics**

64 Descriptive statistics were used for patient characteristics, number of somatic variants per  
65 case, VAFs of each variant, and percentage of large granular lymphocytes in each case, and the  
66 results were summarized as appropriate. Unpaired t-test was used for all quantitative data, and  
67 Fisher exact test or Chi square test was used for qualitative data. VAF distribution analysis was  
68 performed using the methods described by Galli et al.<sup>9</sup> Linear regression was used to determine

- 69 the correlation between the VAFs of *STAT3* or *STAT5B* variants and the VAFs of predominant  
70 concurrent variants as well as the percentage of LGLs by flow cytometry.

71  
72  
73

**Supplementary Tables**

**Supplementary table 1.** List of shared genes and their transcript IDs (RefSeq accession number) tested by myeloid mutation NGS panels in all institutions.

| Genes          | Accession      | Genes         | Accession   | Genes        | Accession      | Genes         | Accession      | Genes         | Accession   | Genes         | Accession      |
|----------------|----------------|---------------|-------------|--------------|----------------|---------------|----------------|---------------|-------------|---------------|----------------|
| <i>ANKRD26</i> | NM_014915.2    | <i>CSF3R</i>  | NM_156039.3 | <i>GATA1</i> | NM_002049.3    | <i>KMT2C</i>  | NM_170606.3    | <i>PTPN11</i> | NM_002834.3 | <i>STAG2</i>  | NM_001042749.2 |
| <i>ASXL1</i>   | NM_015338.5    | <i>CUX1</i>   | NM_181552.2 | <i>GATA2</i> | NM_001145661.1 | <i>KRAS</i>   | NM_004985.4    | <i>RAD21</i>  | NM_006265.2 | <i>STAT3</i>  | NM_139276.2    |
| <i>ASXL2</i>   | NM_018263.6    | <i>DDX41</i>  | NM_016222.4 | <i>GNAS</i>  | NM_000516.1    | <i>LUC7L2</i> | NM_016019.1    | <i>RUNX1</i>  | NM_001754.4 | <i>STAT5B</i> | NM_012488.4    |
| <i>BCOR</i>    | NM_001123385.1 | <i>DNMT3A</i> | NM_175629.2 | <i>IDH1</i>  | NM_005896.3    | <i>MPL</i>    | NM_005373.2    | <i>SETBP1</i> | NM_015559.2 | <i>TET2</i>   | NM_001127208.2 |
| <i>BCORL1</i>  | NM_021946.4    | <i>ETNK1</i>  | NM_018638.4 | <i>IDH2</i>  | NM_002168.3    | <i>NF1</i>    | NM_000267.3    | <i>SF3B1</i>  | NM_012433.3 | <i>TP53</i>   | NM_000546.5    |
| <i>BRAF</i>    | NM_004333.4    | <i>ETV6</i>   | NM_001987.4 | <i>JAK2</i>  | NM_004972.3    | <i>NOTCH1</i> | NM_017617.3    | <i>SH2B3</i>  | NM_005475.3 | <i>U2AF1</i>  | NM_006758.2    |
| <i>CALR</i>    | NM_004343.3    | <i>EZH2</i>   | NM_004456.4 | <i>JAK3</i>  | NM_000215.3    | <i>NPM1</i>   | NM_002520.6    | <i>SMC1A</i>  | NM_006306.2 | <i>U2AF2</i>  | NM_007279.2    |
| <i>CBL</i>     | NM_005188.3    | <i>FBXW7</i>  | NM_018315.5 | <i>KDM6A</i> | NM_001291415.1 | <i>NRAS</i>   | NM_002524.5    | <i>SMC3</i>   | NM_005445.3 | <i>WT1</i>    | NM_024426.4    |
| <i>CEBPA</i>   | NM_004364.4    | <i>FLT3</i>   | NM_004119.2 | <i>KIT</i>   | NM_000222.2    | <i>PHF6</i>   | NM_001015877.1 | <i>SRSF2</i>  | NM_003016.4 | <i>ZRSR2</i>  | NM_005089.3    |

74

**Supplemental table 2.** Complete list of genes on NGS panels at each institution.

| Institutions | Complete gene list                                                                                                                                                                                                                                                                                                                                                                                                                                                                                                                                                                                                                                                                                                                                                                                                                                                                                                                                                                                                                                                                                                                                                                                                                                                                                                                                                                                                                                                                                                                        |
|--------------|-------------------------------------------------------------------------------------------------------------------------------------------------------------------------------------------------------------------------------------------------------------------------------------------------------------------------------------------------------------------------------------------------------------------------------------------------------------------------------------------------------------------------------------------------------------------------------------------------------------------------------------------------------------------------------------------------------------------------------------------------------------------------------------------------------------------------------------------------------------------------------------------------------------------------------------------------------------------------------------------------------------------------------------------------------------------------------------------------------------------------------------------------------------------------------------------------------------------------------------------------------------------------------------------------------------------------------------------------------------------------------------------------------------------------------------------------------------------------------------------------------------------------------------------|
| OHSU         | <i>ABLI, AKT1, ANKRD26, ARID1A, ARID1B, ASXL1, ASXL2, ATG2B, ATM, ATRX, BCL2, BCL6, BCOR, BCORL1, BIRC3, BIRC6, BLM, BRAF, BRCA1, BRCA2, BRCC3, BRD4, BTK, CALR, CARD11, CASP10, CBL, CBLB, CBLC, CCND1, CCND3, CCR4, CD27, CD79A, CD79B, CDH11, CDKN2A, CDKN2C, CEBPA, CHD2, CHEK2, CREBBP, CRLF2, CSF1R, CSF3R, CTCF, CTLA4, CUX1, CXCR4, DAXX, DDX41, DDX54, DHX15, DHX29, DIS3, DNAH5, DNAH9, DNAJC21, DNM2, DNMT1, DNMT3A, DOCK8, DTX1, EED, EFTUD1, EGFR, ELANE, EP300, ERBB4, ETNK1, ETV6, EZH2, FAM47A, FAM5C, FAS, FAT1, FAT4, FBXO11, FBXW7, FLT3, FOXO1, FYN, GATA1, GATA2, GATA3, GNA13, GNAS, GNB1, GSKIP, HAX1, HIST1H1E, HNRNPK, HRAS, HVCN1, ID3, IDH1, IDH2, IGLL5, IKZF1, IKZF3, IL7R, IRF4, JAK1, JAK2, JAK3, KDM6A, KIT, KLF2, KLHL6, KMT2A, KMT2C, KMT2D, KRAS, LLGL2, LRRC4, LUC7L2, MAGT1, MAML1, MAP2K1, MECOM, MED12, MEF2B, MGA, MLH1, MPL, MSH2, MSH6, MYC, MYD88, NAF1, NBN, NF1, NFKBIE, NOTCH1, NOTCH2, NPAT, NPM1, NRAS, NT5C2, NXF1, PAX5, PCLO, PDGFRA, PHF6, PIGA, PIK3CD, PIM1, PLCG1, PLCG2, PMS2, POT1, PPM1D, PRDM1, PRKCB, PRPF40B, PRPF8, PRPS1, PSMB5, PTCH1, PTEN, PTPN11, RAD21, RB1, RBBP6, RELN, RHOA, RIT1, RPS15, RTEL1, RUNX1, RYR1, RYR2, SAMD9, SAMD9L, SAMHD1, SBDS, SETBP1, SETD2, SETDB1, SF1, SF3A1, SF3B, SH2B3, SMARCA2, SMARCB1, SMC1A, SMC3, SOCS1, SPEN, SPI1, SRP72, SRSF2, STAG2, STAT3, STAT5B, STXBP2, SUZ12, SYK, SYNE1, TBL1XR1, TCF3, TCF4, TERC, TERT, TET2, TNFAIP3, TNFRSF14, TP53, TRAF3, U2AF1, U2AF2, UBR5, USH2A, VAV1, WAS, WHSC1, WTI, XPO1, ZBTB7A, ZRSR2</i> |
| ARUP         | <i>ANKRD26, ASXL1, ASXL2, BCOR, BCORL1, BRAF, CALR, CBL, CBLB, CEBPA, CSF3R, CUX1, DDX41, DNMT1, DNMT3A, ELANE, ETNK1, ETV6, EZH2, FBXW7, FLT3, GATA1, GATA2, GNAS, HNRNPK, IDH1, IDH2, IL7R, JAK1, JAK2, JAK3, KDM6A, KIT, KMT2A, KMT2C, KRAS, LUC7L2, MPL, NF1, NOTCH1, NPM1, NRAS, NSD1, PHF6, PIGA, PRPF40B, PRPF8, PTPN11, RAD21, RUNX1, SETBP1, SF3B1, SH2B3, SMC1A, SMC3, SRSF2, STAG2, STAT3, STAT5B, SUZ12, TET2, TP53, U2AF1, U2AF2, WTI, ZRSR2</i>                                                                                                                                                                                                                                                                                                                                                                                                                                                                                                                                                                                                                                                                                                                                                                                                                                                                                                                                                                                                                                                                             |
| KUMC         | <i>ABLI, ADA, ANKRD26, ASXL1, ASXL2, ATM, ATRX, BCL6, BCOR, BCORL1, BCR, BIRC3, BLM, BRAF, BRCA1, BRCA2, BRINP3, C17orf97, CALR, CARD11, CBL, CBLB, CBLC, CDKN2A, CEBPA, CHEK2, CREBBP, CRLF2, CSF1R, CSF3R, CTCF, CUX1, DAXX, DDX41, DNM2, DNMT1, DNMT3A, EED, EGFR, ELANE, EP300, ETNK1, ETV6, EZH2, FAM154B, FAM47A, FAS, FBXW7, FLRT2, FLT3, GATA1, GATA2, GJB3, GNAS, HNRNPK, HRAS, IDH1, IDH2, IKZF1, IKZF3, IL7R, JAK1, JAK2, JAK3, KAT6A, KCNA4, KCNK13, KDM6A, KDR, KIT, KLHDC8B, KLHL6, KMT2A, KMT2C, KRAS, LRRC4, LUC7L2, MAP2K1, MLH1, MPL, MSH2, MSH6, MYC, MYD88, NBN, NF1, NOTCH1, NPAT, NPM1, NRAS, NSD1, NTRK3, OR13H1, OR8B12, P2RY2, PAX5, PCDHB1, PDGFRA, PHF6, PML, PMS2, PRAMEF2, PRF1, PRPF40B, PRPF8, PTEN, PTPN11, RAD21, RB1, RELN, RUNX1, SETBP1, SF1, SF3A1, SF3B1, SH2B3, SH2D1A, SMARCB1, SMC1A, SMC3, SRP72, SRSF2, STAG2, STAT3, STXBP2, SUZ12, TAL1, TERC, TERT, TET2, TNFRSF13B, TP53, TPMT, TUBA3C, U2AF1, U2AF2, WAS, WRN, WTI, XPO1, ZRSR2</i>                                                                                                                                                                                                                                                                                                                                                                                                                                                                                                                                                       |
| UPenn        | <i>ABLI, ASXL2, ATM, B2M, BCL2, BCOR, BCORL1, BIRC3, BRAF, BRCA2, BRINP3, BRINP3, BRIPI, BTK, CALR, CARD11, CBL, CD79A, CD79B, CDKN2A, CEBPA, CIITA, CREBBP, CSF1R, CSF3R, CXCR4, DDX3X, DDX41, DICER, DNMT3A, EGR2, ERCC4, ETV6, EZH2, FANCA, FANCC, FANCD2, FANCE, FANCF, FANCL, FANCM, FBXW7, FLT3, GATA2, GNA13, GNAS, HNRNPK, ID3, IDH1, IDH2, IKZF1, IL7R, JAK2, JAK3, KIT, KLF2, KLHL6, KRAS, MAP2K1, MAPK1, MIR142, MPL, MYC, MYCN, MYD88, NF1, NFKBIE, NOTCH1, NOTCH2, NPM1, NRAS, PALB2, PDGFRA, PHF6, PLCG1, PLCG2, POT1, PRPF40B, PTEN, PTPN11, RAD21, RAD51, RAD51C, RHOA1, RIT1, RPS15, RRAGC, RUNX1, SETBP1, SF1, SF3A1, SF3B1, SLX4, SMC1A, SOCS1, SRSF2, STAG2, STAT3, STAT5B, TNFRSF14, TP53, TPMT, TRAF3, U2AF1, U2AF2, WTI, XPO1, XRCC2, ZMYM3, ZRSR2</i>                                                                                                                                                                                                                                                                                                                                                                                                                                                                                                                                                                                                                                                                                                                                                             |

**Supplemental Table 3.** The molecular and cytogenetic profiles of 118 hematologic neoplasm patients with pathogenic/likely pathogenic *STAT3* and *STAT5B* variants and additional 18 MDS patients with expanded T-LGL population

| Pts | Age | Sex | Dx      | STAT   | NA             | AA        | VAF (%) | Other variants                                                                                | VAF (%)     | Tiers       | Cytogenetics                                | TCC      |
|-----|-----|-----|---------|--------|----------------|-----------|---------|-----------------------------------------------------------------------------------------------|-------------|-------------|---------------------------------------------|----------|
| 1   | 79  | M   | T-LGLL  | STAT3  | c.1919A>T      | p.Y640F   | 7       | ASXL1 c.1934dup, p.G646fs<br>TET2 c.3176C>A, p.S1059*<br>TET2 c.4487dup, p.S1497fs            | 6<br>5<br>1 | 1<br>1<br>1 | 46,XY[20]                                   | Positive |
| 2   | 83  | M   | T-LGLL  | STAT3  | c.1940A>T      | p.N647I   | 12      | DNMT3A c.1474+1del, p.?<br>DNMT3A c.2694_2703dup, p.F902fs                                    | 13<br>14    | 1<br>1      |                                             | Positive |
| 3   | 66  | M   | T-LGLL  | STAT3  | c.1852G>C      | p.G618R   | 8       | DNMT3A c.2645G>A, p.R882H<br>DNMT3A c.2694_2703dup, p.F902fs                                  | 8<br>2      | 1<br>1      |                                             |          |
| 4   | 74  | F   | T-LGLL  | STAT3  | c.1919A>T      | p.Y640F   | 10      | DNMT3A c.2645G>A, p.R882H                                                                     | 12          | 1           |                                             |          |
| 5   | 66  | M   | T-LGLL  | STAT3  | c.1981G>T      | p.D661Y   | 4       | DNMT3A c.1040Tdel, p.L347fs                                                                   | 2           | 1           | 46,XY[20]                                   | Positive |
| 6   | 84  | M   | T-LGLL  | STAT3  | c.1919A>T      | p.Y640F   | 6       | STAT3 c.1981G>T, p.D661Y<br>DNMT3A c.1976G>A, p.R659H                                         | 3<br>2      | 1<br>2      |                                             | Positive |
| 7   | 75  | M   | T-LGLL  | STAT3  | c.1982A>T      | p.D661V   | 30      | TET2 c.5618T>C, p.I1873T<br>TET2 c.1648C>T, p.R550*                                           | 32<br>30    | 1<br>1      | 46,XY[20]                                   |          |
| 8   | 82  | F   | T-LGLL  | STAT3  | c.1919A>T      | p.Y640F   | 4       | STAT3 c.1852G>C, p.G618R<br>TET2 c.1630C>T, p.R544*                                           | 6<br>6      | 1<br>1      |                                             |          |
| 9   | 85  | F   | T-LGLL  | STAT3  | c.1919A>T      | p.Y640F   | 3       | TET2 c.4264_4267del, p.K1422fs<br>TET2 c.2759_2766dup, p.N923*<br>TET2 c.741_742dup, p.H248fs | 7<br>2<br>2 | 1<br>1<br>1 |                                             |          |
| 10  | 73  | M   | T-LGLL  | STAT3  | c.1982A>T      | p.D661V   | 30      | TET2 c.1945C>T, p.Gln649*<br>TET2 c.2822dup, p.Pro942fs                                       | 32<br>29    | 1<br>1      | 46,XY[20]                                   | Positive |
| 11  | 71  | F   | T-LGLL  | STAT3  | c.1919A>T      | p.Y640F   | 6       | TET2 c.5620G>A, p.E1874K                                                                      | 6           | 1           | 46,XX[13]                                   | Positive |
| 12  | 83  | M   | T-LGLL  | STAT3  | c.1919A>T      | p.Y640F   | 6       | TP53 c.743G>A, p.R248Q<br>STAG2 c.570_572delCAT, p.I191del                                    | 3<br>8      | 1<br>1      | 46,XY[20]                                   | Positive |
| 13  | 53  | F   | T-LGLL  | STAT3  | c.1919A>T      | p.D661Y   | 32      | TP53 c.743G>A, p.R248Q                                                                        | 31          | 1           |                                             |          |
| 14  | 67  | M   | T-LGLL  | STAT3  | c.1847_1849del | p.E616del | 4       | TP53 c.706T>C, p.Y236H                                                                        | 3           | 1           |                                             | Positive |
| 15  | 65  | F   | T-LGLL  | STAT3  | c.1919A>T      | p.Y640F   | 5       | CEBPA c.543C>A, p.Y181*                                                                       | 5           | 1           | 46,XY[20]                                   | Positive |
| 16  | 75  | M   | T-LGLL  | STAT3  | c.1982A>T      | p.D661V   | 24      |                                                                                               |             |             | 46,XY[20]                                   |          |
| 17  | 70  | M   | T-LGLL  | STAT3  | c.1940A>T      | p.N647I   | 30      |                                                                                               |             |             | 46,XY[25]                                   | Positive |
| 18  | 74  | M   | T-LGLL  | STAT3  | c.1919A>T      | p.Y640F   | 17      | STAT3 c.1981G>T, p.D661Y                                                                      | 6           | 1           |                                             |          |
| 19  | 48  | M   | T-LGLL  | STAT3  | c.1919A>T      | p.Y640F   | 6       |                                                                                               |             |             |                                             | Positive |
| 20  | 83  | M   | T-LGLL  | STAT3  | c.1842C>G      | p.S614R   | 5       |                                                                                               |             |             | 46,XY[20]                                   |          |
| 21  | 67  | F   | T-LGLL  | STAT3  | c.1919A>T      | p.Y640F   | 11      |                                                                                               |             |             |                                             | Positive |
| 22  | 70  | M   | T-LGLL  | STAT3  | c.1919A>T      | p.Y640F   | 29      |                                                                                               |             |             | 46,XY[20]                                   | Positive |
| 23  | 66  | M   | T-LGLL  | STAT3  | c.1852G>C      | p.G618R   | 4       |                                                                                               |             |             | 46,XY[20]                                   |          |
| 24  | 80  | M   | T-LGLL  | STAT3  | c.1981G>T      | p.D661Y   | 15      |                                                                                               |             |             | 46,XY[20]                                   |          |
| 25  | 85  | M   | T-LGLL  | STAT3  | c.1919A>T      | p.Y640F   | 4       |                                                                                               |             |             | 46,XY[20]                                   | Positive |
| 26  | 51  | M   | T-LGLL  | STAT3  | c.1919A>T      | p.Y640F   | 5       |                                                                                               |             |             | NI                                          | Positive |
| 27  | 71  | M   | T-LGLL  | STAT3  | c.1940A>T      | p.N647I   | 14      |                                                                                               |             |             |                                             |          |
| 28  | 79  | M   | T-LGLL  | STAT3  | c.1940A>T      | p.N647I   | 6       |                                                                                               |             |             | 46,XY[20]                                   |          |
| 29  | 66  | M   | T-LGLL  | STAT3  | c.1229A>G      | p.H410R   | 9       |                                                                                               |             |             | 46,XY[20]                                   | Positive |
| 30  | 53  | F   | T-LGLL  | STAT3  | c.1919A>T      | p.Y640F   | 7       |                                                                                               |             |             | 46,XX[20]                                   | Positive |
| 31  | 88  | M   | T-LGLL  | STAT3  | c.1919A>T      | p.Y640F   | 5       |                                                                                               |             |             |                                             | Positive |
| 32  | 74  | M   | T-LGLL  | STAT3  | c.1842C>G      | p.S614R   | 8       |                                                                                               |             |             | 46,XY[20]                                   | Positive |
| 33  | 61  | M   | T-LGLL  | STAT3  | c.1981G>T      | p.D661Y   | 43      |                                                                                               |             |             | 46,XY[20]                                   | positive |
| 34  | 19  | F   | T-LGLL  | STAT3  | c.1919A>T      | p.Y640F   | 9       |                                                                                               |             |             |                                             | Positive |
| 35  | 78  | M   | T-LGLL  | STAT3  | c.1982A>T      | p.D661V   | 42      |                                                                                               |             |             |                                             | positive |
| 36  | 35  | M   | T-LGLL  | STAT3  | c.1842C>G      | p.S614R   | 3       |                                                                                               |             |             | 46,XY[20]                                   | Positive |
| 37  | 69  | M   | T-LGLL  | STAT3  | c.1981G>T      | p.D661Y   | 11      |                                                                                               |             |             |                                             | Positive |
| 38  | 67  | F   | T-LGLL  | STAT3  | c.1981G>T      | p.D661Y   | 14      |                                                                                               |             |             | 45,X,-X[1]/45,sl,add(5)(p15.1)[2]/46,XX[17] | Positive |
| 39  | 51  | F   | T-LGLL  | STAT3  | c.1981G>T      | p.D661Y   | 19      |                                                                                               |             |             | 47,XX,+X[3]/46,XX[17]                       | Positive |
| 40  | 89  | F   | T-LGLL  | STAT3  | c.1919A>T      | p.Y640F   | 9       |                                                                                               |             |             | NI                                          | Positive |
| 41  | 67  | M   | T-LGLL  | STAT3  | c.1919A>T      | p.Y640F   | 18      |                                                                                               |             |             | 45,X,-Y[14]/46,XY[6]                        | Positive |
| 42  | 74  | F   | T-LGLL  | STAT3  | c.1919A>T      | p.Y640F   | 8       |                                                                                               |             |             | N                                           | Positive |
| 43  | 64  | M   | T-LGLL  | STAT3  | c.1981G>T      | p.D661Y   | 7       |                                                                                               |             |             | N                                           | Positive |
| 44  | 66  | M   | T-LGLL  | STAT3  | c.1940A>T      | p.N647I   | 4       |                                                                                               |             |             | 46,XY[20]                                   | Positive |
| 45  | 42  | F   | T-LGLL  | STAT5B | c.1924A>C      | p.N642H   | 5       |                                                                                               |             |             | 46,XX[20]                                   | Positive |
| 46  | 75  | M   | T-LGLL  | STAT5B | c.1810C>T      | p.H604Y   | 5       |                                                                                               |             |             | 46,XX[20]                                   | Positive |
| 47  | 38  | M   | NK-LGLL | STAT3  | c.1973A>G      | p.K658R   | 11      | DNMT3A c.2206C>T, p.R736C<br>TET2 c.3707_3718del,<br>p.I1236_L1240delinsM                     | 4<br>24     | 1<br>1      | 46,XY[20]                                   | Negative |
| 48  | 71  | M   | NK-LGLL | STAT3  | c.1852G>C      | p.G618R   | 3       | DNMT3A c.2202del, p.Y735fs<br>DNMT3A c.2202del, p.Y735fs                                      | 1<br>1      | 1<br>1      | 46,XY[20]                                   | Negative |
| 49  | 73  | M   | NK-LGLL | STAT3  | c.1842C>G      | p.S614R   | 5       | DNMT3A c.1969G>A, p.V657M                                                                     | 4           | 1           | 46,XY[20]                                   |          |
| 50  | 78  | M   | NK-LGLL | STAT3  | c.1981G>T      | p.D661Y   | 13      | TP53, c.542G>A, p.R181H<br>KMT2C, c.11647del, p.D3883fs*3                                     | 17<br>4     | 1<br>1      | 46,XY[20]                                   |          |

|    |    |   |                             |        |                |           |    |                                                                                                                                                                                                      |                                       |                                 |                                                                                                            |                                                                                                                                                                                                                                                                                                                                                               |          |
|----|----|---|-----------------------------|--------|----------------|-----------|----|------------------------------------------------------------------------------------------------------------------------------------------------------------------------------------------------------|---------------------------------------|---------------------------------|------------------------------------------------------------------------------------------------------------|---------------------------------------------------------------------------------------------------------------------------------------------------------------------------------------------------------------------------------------------------------------------------------------------------------------------------------------------------------------|----------|
| 51 | 85 | M | NK-LGLL                     | STAT3  | c.1981G>T      | p.D661Y   | 39 |                                                                                                                                                                                                      |                                       |                                 |                                                                                                            |                                                                                                                                                                                                                                                                                                                                                               |          |
| 52 | 77 | M | NK-LGLL                     | STAT3  | c.1981G>T      | p.D661Y   | 25 |                                                                                                                                                                                                      |                                       |                                 |                                                                                                            |                                                                                                                                                                                                                                                                                                                                                               |          |
| 53 | 54 | M | NK-LGLL                     | STAT3  | c.1981G>T      | p.D661Y   | 7  |                                                                                                                                                                                                      |                                       |                                 |                                                                                                            | Negative                                                                                                                                                                                                                                                                                                                                                      |          |
| 54 | 52 | M | NK-LGLL                     | STAT3  | c.1982A>T      | p.D661V   | 9  |                                                                                                                                                                                                      |                                       |                                 | 46,XY[20]                                                                                                  | Negative                                                                                                                                                                                                                                                                                                                                                      |          |
| 55 | 74 | M | NK-LGLL                     | STAT3  | c.1982A>T      | p.D661V   | 31 |                                                                                                                                                                                                      |                                       |                                 |                                                                                                            | Negative                                                                                                                                                                                                                                                                                                                                                      |          |
| 56 | 55 | M | NK/T lymphoma; EBV positive | STAT5B | c.1924A>C      | p.N642H   | 1  |                                                                                                                                                                                                      |                                       |                                 | 45,X,-Y,i(7)(q10),add(8)(p23)[8]/46,XY[3]                                                                  | Positive                                                                                                                                                                                                                                                                                                                                                      |          |
| 57 | 69 | M | T-PLL                       | STAT5B | c.1994A>T      | p.Y665F   | 3  |                                                                                                                                                                                                      |                                       |                                 | 46,XX,+8,i(8)(q10)x2-3,del(11)(q22q23),inv(14)(q11.2q32),add(15)(p11.1),der(18;21)(q10;q10)[cp3]/46,XX[20] | Positive                                                                                                                                                                                                                                                                                                                                                      |          |
| 58 | 39 | M | T-PLL                       | STAT5B | c.1924A>C      | p.N642H   | 40 | STAG2 c.1737_1738del, p.S579fs<br>JAK1 c.2097_2108delins12, p.S703I                                                                                                                                  | 63<br>2                               | 1<br>1                          |                                                                                                            | 44,XY,add(1)(q42),add(4)(q31),inv(5)(p15.1q32),-7,t(11;13)(p11.2;q13),del(12)(p11.2),add(14)(p11.2),der(14)t(7;14)(q10;p11.2),add(16)(p13.3),-20,add(22)(p11.2)[11]/44,idem,+7,i(7)(q10),-14,-der(14)[5]/46,XY[4]                                                                                                                                             | Positive |
| 59 | 27 | M | B-LBL                       | STAT3  | c.1982A>T      | p.D661V   | 3  | CEBPA 322_336delinsA, p.Y108fs<br>CEBPA c.937_939dup, p.K313dup                                                                                                                                      | 51<br>29                              | 1<br>1                          |                                                                                                            |                                                                                                                                                                                                                                                                                                                                                               |          |
| 60 | 67 | M | PTLD; PBL                   | STAT3  | c.1842C>G      | p.S614R   | 8  | STAT3 c.1842C>A, p.S614R<br>TP53 c.743G>A, p.R248Q                                                                                                                                                   | 5<br>31                               | 1<br>1                          |                                                                                                            | 46,XY,t(8;14)(q24;q32),der(13)t(1;13)(q21;q32),add(22)(p11.2)[17]<br>/46,sl,add(1)(q23)[1]/46,XY[2]                                                                                                                                                                                                                                                           |          |
| 61 | 66 | M | DLBCL                       | STAT3  | c.1144C>T      | p.R382W   | 24 | MYD88 c.755T>C, p.L265P                                                                                                                                                                              | 20                                    | 1                               |                                                                                                            | 52,Y,add(X)(q24),+Y,der(1)t(1;8)(p36.1;q11.2),add(2)(q32),der(2)add(2)(p11.2)add(2)(q33),+3,add(4)(q23),inv(4)(p15.2q27),inv(6)(p25q21),+7,add(7)(p15.1),add(7)(q22)x2,add(8)(q13),add(9)(p22),add(9)(p24),add(11)(p11.2),add(13)(q12),add(14)(q24)x2,add(17)(q21),+18,der(18)del(18)(q21)idic(18)(p11.2),+22,add(22)(q12),+mar[cp12]/53,idem,+18[2]/46,XY[6] |          |
| 62 | 72 | F | MM                          | STAT3  | c.1981G>T      | p.D661Y   | 2  | DNMT3A c.1949T>C, p.L650R<br>DNMT3A c.855+1G>A, p.?                                                                                                                                                  | 4<br>2                                | 1<br>1                          |                                                                                                            | 46,XX[25]                                                                                                                                                                                                                                                                                                                                                     |          |
| 63 | 53 | M | CLL                         | STAT3  | c.1982A>T      | p.D661V   | 2  |                                                                                                                                                                                                      |                                       |                                 |                                                                                                            |                                                                                                                                                                                                                                                                                                                                                               |          |
| 64 | 55 | M | MM                          | STAT3  | c.1969_1971dup | p.Y657dup | 15 |                                                                                                                                                                                                      |                                       |                                 |                                                                                                            |                                                                                                                                                                                                                                                                                                                                                               |          |
| 65 | 78 | M | MM                          | STAT5B | c.1883C>G      | p.T628S   | 5  |                                                                                                                                                                                                      |                                       |                                 |                                                                                                            | Negative                                                                                                                                                                                                                                                                                                                                                      |          |
| 66 | 47 | M | B-LBL                       | STAT5B | c.2135T>A      | p.V712E   | 40 | STAT5B c.1883C>G, p.T628S<br>KDM6A c.2688del, p.N897fs                                                                                                                                               | 5<br>48                               | 1<br>1                          |                                                                                                            | 45,X,-Y[7]/46,XY[13]<br>48,Y,add(X)(q24),add(8)(q13),add(11)(p11.2),add(13)(q12),add(14)(q24)x2,add(17)(q21),+18,der(27)18del(18)(q21)idic(18)(p11.2),+22,add(22)(q12),+mar[cp12]/53,idem,+18[2]/46,XY[3]                                                                                                                                                     |          |
| 67 | 70 | M | T-LGLL; MDS                 | STAT3  | c.1919A>T      | p.Y640F   | 3  |                                                                                                                                                                                                      |                                       |                                 |                                                                                                            | 46,XY,del(5)(q13q33)[12]/46,XY[8]                                                                                                                                                                                                                                                                                                                             | Positive |
| 68 | 56 | M | T-LGLL; MDS                 | STAT3  | c.1919A>T      | p.Y640F   | 16 | SF3B1, H662Y                                                                                                                                                                                         | 13                                    | 1                               |                                                                                                            | 46,XY[20]                                                                                                                                                                                                                                                                                                                                                     | Positive |
| 69 | 64 | F | Anemia                      | STAT3  | c.1919A>T      | p.Y640F   | 17 |                                                                                                                                                                                                      |                                       |                                 |                                                                                                            | Negative                                                                                                                                                                                                                                                                                                                                                      |          |
| 70 | 60 | F | Cytopenia                   | STAT3  | c.1981G>T      | p.D661Y   | 29 |                                                                                                                                                                                                      |                                       |                                 |                                                                                                            | 46,XX[20]                                                                                                                                                                                                                                                                                                                                                     | Negative |
| 71 | 64 | M | Pancytopenia                | STAT3  | c.1919A>T      | p.Y640F   | 8  |                                                                                                                                                                                                      |                                       |                                 |                                                                                                            |                                                                                                                                                                                                                                                                                                                                                               |          |
| 72 | 59 | F | Neutropenia                 | STAT3  | c.1919A>T      | p.Y640F   | 20 |                                                                                                                                                                                                      |                                       |                                 |                                                                                                            |                                                                                                                                                                                                                                                                                                                                                               |          |
| 73 | 80 | M | Anemia                      | STAT3  | c.1982A>T      | p.D661V   | 6  | STAT3 c.509A>T, p.D170V<br>ASXL1 c.1900_1922del, p.E635fs                                                                                                                                            | 3<br>2                                | 2<br>1                          |                                                                                                            | 46,XY[20]                                                                                                                                                                                                                                                                                                                                                     |          |
| 74 | 34 | M | Anemia                      | STAT3  | c.1919A>T      | p.Y640F   | 4  | DNMT3A c.2099C>T, p.P700L                                                                                                                                                                            | 2                                     | 1                               |                                                                                                            | 46,XY[1]/46,XX[19]                                                                                                                                                                                                                                                                                                                                            |          |
| 75 | 76 | M | AA                          | STAT3  | c.1981G>T      | p.D661Y   | 5  | DNMT3A c.2497del, p.I833fs<br>DNMT3A c.2259G>T, p.W753C                                                                                                                                              | 5<br>5                                | 1<br>2                          |                                                                                                            |                                                                                                                                                                                                                                                                                                                                                               |          |
| 76 | 67 | M | Anemia                      | STAT3  | c.1919A>T      | p.Y640F   | 2  | SF3B1 c.1997A>C, p.K666T<br>CBL c.773G>A, p.W258*<br>TET2 c.3244G>T, p.E1082*<br>TET2 c.5698_5700del, p.V1900del                                                                                     | 4<br>4<br>2<br>3                      | 1<br>1<br>1<br>2                |                                                                                                            |                                                                                                                                                                                                                                                                                                                                                               |          |
| 77 | 78 | M | MDS/MPN                     | STAT3  | c.1981G>T      | p.D661Y   | 4  | SF3B1 c.2098A>G, p.K700E<br>DNMT3A c.1474_1474+5del, p.?                                                                                                                                             | 5<br>11                               | 1<br>1                          |                                                                                                            |                                                                                                                                                                                                                                                                                                                                                               |          |
| 78 | 69 | F | CMML                        | STAT3  | c.1840A>C      | p.S614R   | 5  | ASXL1 c.2525del, p.N842fs<br>STAG2 c.1798delinsAC, p.Y600fs<br>U2AF2 c.572_586del, p.I191_K195del                                                                                                    | 6<br>4<br>5                           | 1<br>1<br>2                     |                                                                                                            | 46,XX[20]                                                                                                                                                                                                                                                                                                                                                     |          |
| 79 | 57 | M | MDS/MPN                     | STAT3  | c.1840A>C      | p.S614R   | 47 | ASXL1 c.1585C>T, p.Q529*<br>SRSF2 c.284C>T, p.P95L<br>CSF3R c.1853C>T, p.T618I<br>STAG2 c.1551_1552insTAAA, p.E518*<br>LUC7L2 c.838C>T, p.R280*<br>KRAS c.38G>A, p.G13D<br>SETBP1 c.2602G>C, p.D868H | 46<br>45<br>65<br>41<br>98<br>44<br>4 | 1<br>1<br>1<br>1<br>1<br>1<br>1 |                                                                                                            |                                                                                                                                                                                                                                                                                                                                                               |          |
| 80 | 79 | F | MDS/MPN                     | STAT3  | c.1840A>C      | p.S614R   | 1  | SRSF2 c.284C>A, p.P95H<br>ASXL1 c.2290del, p.L764fs<br>CBL c.1247G>A, p.C416Y<br>SETBP1 c.2608G>A, p.G870S                                                                                           | 62<br>43<br>85<br>47                  | 1<br>1<br>1<br>1                |                                                                                                            | 46,XX[20]                                                                                                                                                                                                                                                                                                                                                     |          |
| 81 | 67 | M | CMML                        | STAT3  | c.1852G>C      | p.G618R   | 14 | ASXL1 c.3055A>T, p.R1019*                                                                                                                                                                            | 35                                    | 1                               |                                                                                                            | 46,XY[3]                                                                                                                                                                                                                                                                                                                                                      |          |



|     |    |   |     |       |                |           |    |                                       |    |   |                                                               |
|-----|----|---|-----|-------|----------------|-----------|----|---------------------------------------|----|---|---------------------------------------------------------------|
|     |    |   |     |       |                |           |    | SRSF2 c.284C>A, p.P95H                | 37 | 1 |                                                               |
|     |    |   |     |       |                |           |    | SETBP1 c.2602G>A, p.D868N             | 36 | 1 |                                                               |
|     |    |   |     |       |                |           |    | KRAS c.99T>A, p.D33E                  | 21 | 1 |                                                               |
|     |    |   |     |       |                |           |    | KRAS c.351A>T, p.K117N                | 35 | 1 |                                                               |
| 82  | 70 | M | MDS | STAT3 | c.1919A>T      | p.Y640F   | 5  | ASXL1 c.1934dup, p.G646fs             | 25 | 1 | 45,XY,-7[14]/46,XY[3]                                         |
|     |    |   |     |       |                |           |    | SETBP1 c.2602G>A, p.D868N             | 26 | 1 |                                                               |
|     |    |   |     |       |                |           |    | CUX1 c.558del, p.T187fs               | 2  | 1 |                                                               |
|     |    |   |     |       |                |           |    | EZH2 c.187C>T, p.R63*                 | 30 | 1 |                                                               |
|     |    |   |     |       |                |           |    | ETV6 c.226del, p.E76fs                | 27 | 1 |                                                               |
|     |    |   |     |       |                |           |    | EZH2 c.892C>T, p.R298C                | 8  | 2 |                                                               |
| 83  | 48 | F | MDS | STAT3 | c.1144C>T      | p.R382W   | 3  | RUNX1, c.485G>A, p.R162K              | 27 | 1 | 46,XX,der(7)t(1;7)(q12;p12)[14]/46,XX[6]                      |
|     |    |   |     |       |                |           |    | IDH2 c.419G>A, p.R140Q                | 17 | 1 |                                                               |
|     |    |   |     |       |                |           |    | ASXL1 c.1934dup, p.G646fs             | 14 | 1 |                                                               |
|     |    |   |     |       |                |           |    | IDH1 c.394C>T, p.R132C                | 34 | 1 |                                                               |
|     |    |   |     |       |                |           |    | ASXL2 c.3565G>T, p.E1189*             | 12 | 1 |                                                               |
| 84  | 49 | M | MDS | STAT3 | c.1981G>T      | p.D661Y   | 10 | TET2 c.4960C>T, p.Q1654*              | 6  | 1 | 46,XY[20]                                                     |
| 85  | 85 | M | MDS | STAT3 | c.1981G>T      | p.D661Y   | 21 | DNMT3A c.2197G>T, p.E733*             | 13 | 1 |                                                               |
|     |    |   |     |       |                |           |    | TET2 c.1200del, p.P401fs              | 19 | 1 |                                                               |
|     |    |   |     |       |                |           |    | SF3B1 c.2098A>G, p.K700E              | 13 | 1 |                                                               |
| 86  | 74 | M | MDS | STAT3 | c.1981G>T      | p.D661Y   | 4  | TP53 c.711G>A, p.M237I                | 2  | 1 |                                                               |
|     |    |   |     |       |                |           |    | U2AF1 c.470A>C, p.Q157P               | 2  | 1 |                                                               |
|     |    |   |     |       |                |           |    | DNMT3A c.2639del, p.M880fs            | 14 | 1 |                                                               |
|     |    |   |     |       |                |           |    | TET2 c.3411dup, p.K1138*              | 2  | 1 |                                                               |
|     |    |   |     |       |                |           |    | RUNX1 c.1098_1103dup, p.I366_G367dup  | 36 | 2 |                                                               |
|     |    |   |     |       |                |           |    | TP53 c.467_469del, p.R156_V157delinsL | 3  | 2 |                                                               |
| 87  | 84 | M | MDS | STAT3 | c.1840A>C      | p.S614R   | 24 | TP53 c.824G>A, p.C275Y                | 23 | 1 | 46,XY[20]                                                     |
|     |    |   |     |       |                |           |    | DNMT3A c.1315_1316del, p.M439fs       | 2  | 1 |                                                               |
| 88  | 62 | M | MDS | STAT3 | c.1852G>C      | p.G618R   | 36 | STAT3 c.1919A>T, p.Y640F              | 3  | 1 | 46,XY,del(12)(q13q15)[20]                                     |
| 89  | 61 | M | MDS | STAT3 | c.1919A>T      | p.Y640F   | 3  | KIT c.1540G>T, p.E514*                | 3  | 1 |                                                               |
| 90  | 68 | M | AML | STAT3 | c.1975A>C      | p.I659L   | 21 | RUNX1 c.320G>A, p.R107H               | 29 | 1 | 46,XY,t(3;12)(q26.2;p13)[19]/46,XY,del(12)(p11.2)[6]/46,XY[1] |
|     |    |   |     |       |                |           |    | U2AF1, c.470A>C, p.Q157P              | 26 | 1 | Negative                                                      |
|     |    |   |     |       |                |           |    | SETBP1 c.2602G>A, p.D868N             | 26 | 1 | Negative                                                      |
|     |    |   |     |       |                |           |    | MPL c.1771_1794del, p.Y591_C598del    | 37 | 2 |                                                               |
| 91  | 27 | F | AML | STAT3 | c.1840A>C      | p.S614R   | 45 | RUNX1 c.422C>A, p.S141*               | 13 | 1 |                                                               |
|     |    |   |     |       |                |           |    | SETBP1 c.2602G>A, p.D868N             | 48 | 1 |                                                               |
|     |    |   |     |       |                |           |    | WT1 c.1105delinsGG, p.R369fs          | 45 | 1 |                                                               |
|     |    |   |     |       |                |           |    | GATA2 c.1186C>T, p.R396W              | 47 | 1 |                                                               |
|     |    |   |     |       |                |           |    | NRAS c.35G>A, p.G12D                  | 6  | 1 |                                                               |
| 92  | 83 | M | AML | STAT3 | c.1919A>T      | p.Y640F   | 3  | FLT3 c.1745_1840dup, p.?              | NR | 1 |                                                               |
|     |    |   |     |       |                |           |    | FLT3 c.1732_1794dup, p.M578_E598dup   | NR | 1 |                                                               |
|     |    |   |     |       |                |           |    | RUNX1 c.402_405dup, p.N136fs          | 41 | 1 |                                                               |
|     |    |   |     |       |                |           |    | SF3B1 c.1998G>T, p.K666N              | 44 | 1 |                                                               |
|     |    |   |     |       |                |           |    | DNMT3A c.2644C>T, p.R882C             | 45 | 1 |                                                               |
|     |    |   |     |       |                |           |    | PHF6 c.585+2T>A, p.?                  | 5  | 1 |                                                               |
| 93  | 80 | F | AML | STAT3 | c.1139+1G>A    | p.?       | 43 | FLT3 c.1751_1795dup, p.S584_E598dup   |    | 1 | 46,XX[20]                                                     |
|     |    |   |     |       |                |           |    | NPM1 c.860_863dup, p.W288fs           | 1  | 1 |                                                               |
|     |    |   |     |       |                |           |    | DNMT3A c.2096G>A, p.G699D             | 1  | 1 |                                                               |
|     |    |   |     |       |                |           |    | IDH2 c.419G>A, p.R140Q                | 30 | 1 |                                                               |
| 94  | 58 | M | AML | STAT3 | c.1973A>T      | p.Y657F   | 12 | DNMT3A, c.958C>T, p.R320*             | 50 | 1 | 46,XY[20]                                                     |
|     |    |   |     |       |                |           |    | NRAS, c.183A>C, p.Q61H                | 4  | 1 |                                                               |
|     |    |   |     |       |                |           |    | CEBPA, c.890G>C, p.R297P              | 49 | 1 |                                                               |
|     |    |   |     |       |                |           |    | CEBPA, c.539dup, p.Y181fs             | 43 | 1 |                                                               |
| 95  | 22 | F | AML | STAT3 | c.1852G>C      | p.G618R   | 41 | KRAS c.34G>C, p.G12R                  | 41 | 1 |                                                               |
|     |    |   |     |       |                |           |    | JAK3 c.115dup, p.Q39fs                | 29 | 1 |                                                               |
| 96  | 88 | M | AML | STAT3 | c.361A>T       | p.T121S   | 38 | ASXL1 c.2077C>T, p.R693*              | 41 | 1 |                                                               |
|     |    |   |     |       |                |           |    | U2AF2 c.572_586del, p.H191_K195del    | 31 | 2 |                                                               |
| 97  | 74 | F | AML | STAT3 | c.1981G>T      | p.D661Y   | 38 | JAK2 c.1849G>T, p.V617F               | 3  | 1 | 46,XX,del(5)(q13q33)[14]/46,XX[6]                             |
| 98  | 53 | F | MPN | STAT3 | c.1842C>G      | p.S614R   | 44 | JAK2 c.1849G>T, p.V617F               | 96 | 1 | 47,XX,+21[3]/46,XX[17]                                        |
|     |    |   |     |       |                |           |    | ASXL1 c.2077C>T, p.R693*              | 46 | 1 |                                                               |
|     |    |   |     |       |                |           |    | DNMT3A c.2645G>A, p.R882H             | 48 | 1 |                                                               |
|     |    |   |     |       |                |           |    | SETBP1 c.2608G>A, p.G870S             | 47 | 1 |                                                               |
|     |    |   |     |       |                |           |    | WT1 c.1301G>T, p.R434L                | 2  | 1 |                                                               |
| 99  | 67 | M | MPN | STAT3 | c.1840A>C      | p.S614R   | 49 | JAK2 c.1849G>T, p.V617F               | 44 | 1 | 46,XY[11]                                                     |
|     |    |   |     |       |                |           |    | SRSF2 c.284_307del, p.P95_R102del     | 43 | 1 |                                                               |
|     |    |   |     |       |                |           |    | NRAS c.35G>A, p.G12D                  | 46 | 1 |                                                               |
| 100 | 82 | M | MPN | STAT3 | c.1847_1849del | p.E616del | 6  | SETBP1 c.2608G>A, p.G870S             | 47 | 1 | 46,XY[20]                                                     |
|     |    |   |     |       |                |           |    | CSF3R c.1853C>T, p.T618I              | 40 | 1 |                                                               |
|     |    |   |     |       |                |           |    | EZH2 c.1200_1203del, p.E401fs         | 40 | 1 |                                                               |
|     |    |   |     |       |                |           |    | ASXL2 c.1222C>T, p.Q408*              | 49 | 1 |                                                               |
|     |    |   |     |       |                |           |    | ZRSR2 c.83dup, p.K29fs                | 50 | 1 |                                                               |
| 101 | 91 | M | APL | STAT3 | c.1842C>G      | p.S614R   | 8  | SRSF2 c.284C>A, p.P95H                | 2  | 1 | 46,XY,t(15;17)(q22;q21)[17]/46,XY[3]                          |
|     |    |   |     |       |                |           |    | TP53 c.469G>T, p.V157F                | 2  | 1 |                                                               |

|     |    |   |         |        |           |         |    |                                                                                                                                                                                                             |                                        |                                 |                    |
|-----|----|---|---------|--------|-----------|---------|----|-------------------------------------------------------------------------------------------------------------------------------------------------------------------------------------------------------------|----------------------------------------|---------------------------------|--------------------|
| 102 | 74 | M | AML     | STAT5B | c.1924A>C | p.N642H | 42 | FLT3 c.1817_1818ins30,<br>p.P606_R607ins10<br>RUNX1 c.411_412insC, p.E138fs<br>ASXL1 c.1934dup, p.G646fs<br>U2AF1 c.470A>C, p.Q157P<br>PHF6 c.767C>G, p.S256*<br>WT1 c.1143_1144ins16, p.A382fs             | NR<br>48<br>35<br>47<br>94<br>3        | 1<br>1<br>1<br>1<br>1<br>1      |                    |
| 103 | 87 | F | AML     | STAT5B | c.2135T>A | p.V712E | 5  | RUNX1 c.372dup, p.P125fs<br>IDH2 c.515G>A, p.R172K<br>CBL c.1249C>T, p.P417S<br>TET2 c.939del, p.C314fs<br>SH2B3 c.1325_1326insCCACTCCA,<br>p.Q442fs<br>SH2B3 c.1585del, p.V529fs<br>PHF6 c.803T>C, p.V268A | 10<br>30<br>3<br>1<br>7<br>3<br>29     | 1<br>1<br>1<br>1<br>1<br>1<br>2 | 46,XX[1]           |
| 104 | 72 | M | AML     | STAT5B | c.1924A>C | p.N642H | 65 | STAT5B c.2110A>C, p.I704L<br>U2AF1 c.101C>A, p.S34Y<br>TET2 c.1147C>T, p.Q383*<br>ASXL2 c.1840C>T, p.R614*                                                                                                  | 3<br>47<br>96<br>47                    | 1<br>1<br>1<br>1                |                    |
| 105 | 72 | M | AML     | STAT5B | c.1924A>C | p.N642H | 24 | ASXL1 c.1900_1922del, p.E635fs<br>NPM1 c.863_864insCCAG, p.W288fs<br>U2AF1 c.467G>A, p.R156H<br>GATA2 c.685dup, p.L229fs<br>KRAS c.38G>A, p.G13D                                                            | 28<br>10<br>22<br>7<br>6               | 1<br>1<br>1<br>1<br>1           | 46,XX[20]          |
| 106 | 85 | F | MDS     | STAT5B | c.1883C>G | p.T628S | 4  | ASXL1 c.2385del, p.W796fs<br>TET2 c.4677_4681del, p.Y1560fs<br>TET2 c.4679dup, Y1560*                                                                                                                       | 28<br>44<br>41                         | 1<br>1<br>1                     | 46,XX[20]          |
| 107 | 73 | M | MDS     | STAT5B | c.1994A>T | p.Y665F | 9  | SRSF2 c.284_307del, p.P95_R102del<br>CBL c.1258C>T, p.R420*<br>CBL c.403G>T, p.E135*<br>CUX1 c.720C>G, p.N240K<br>CUX1 c.3104dup, p.L1036fs<br>GATA2 c.913C>G, p.L305V                                      | 38<br>11<br>7<br>7<br>27<br>37         | 1<br>1<br>1<br>1<br>1<br>2      | 46,XY[20] Negative |
| 108 | 68 | F | MDS     | STAT5B | c.1924A>C | p.N642H | 46 | SRSF2 c.284C>T, p.P95L<br>ETV6 c.1037A>G, p.Y346C                                                                                                                                                           | 47<br>2                                | 1<br>2                          |                    |
| 109 | 73 | M | MDS     | STAT5B | c.1924A>C | p.N642H | 4  | ASXL1 c.1779dup, p.C594fs<br>SRSF2 c.284C>A, p.P95H                                                                                                                                                         | 32<br>30                               | 1<br>1                          |                    |
| 110 | 64 | M | CMML    | STAT5B | c.1924A>C | p.N642H | 45 | ASXL1 c.1934dup, p.G646fs<br>IDH2 c.419G>A, p.R140Q<br>SRSF2 c.284C>G, p.P95R<br>NRAS c.37G>T, p.G13C<br>NRAS c.190T>G, p.Y64D                                                                              | 37<br>45<br>46<br>27<br>3              | 1<br>1<br>1<br>1<br>2           |                    |
| 111 | 70 | M | CMML    | STAT5B | c.1924A>C | p.N642H | 3  | RUNX1 c.352-1G>A, p.?<br>ASXL1 c.1934dup, p.G646fs<br>SRSF2 c.284C>A, p.P95H<br>STAG2 c.819+1G>A, p.?<br>EZH2 c.2155_2156delinsC, p.R719fs<br>TET2 c.3646C>T, p.R1216*<br>NRAS c.34G>C, p.G12R              | 48<br>34<br>41<br>52<br>24<br>89<br>25 | 1<br>1<br>1<br>1<br>1<br>1<br>1 | 46,XY[20]          |
| 112 | 83 | M | CMML    | STAT5B | c.1924A>C | p.N642H | 3  | TET2 c.3590del, p.K1197fs<br>TET2 c.5026del, p.H1676fs<br>TET2 c.5034_5035del, p.Y1679fs                                                                                                                    | 43<br>36<br>15                         | 1<br>1<br>1                     | 46,XY[20]          |
| 113 | 63 | F | MDS/MPN | STAT5B | c.1994A>T | p.Y665F | 12 | SF3B1 c.2098A>G, p.K700E<br>CALR c.1122_1125del, p.K374fs<br>NRAS c.436G>A, p.A146T<br>TET2 c.2737C>T, p.Q913*<br>SH2B3 c.530del, p.G177fs                                                                  | 17<br>12<br>24<br>47<br>21             | 1<br>1<br>1<br>1<br>1           |                    |
| 114 | 78 | F | MPN     | STAT5B | c.1924A>C | p.N642H | 37 | JAK2 c.1849G>T, p.V617F<br>SRSF2 c.284C>G, p.P95R<br>SMC3 c.2428-2A>G, p.?                                                                                                                                  | 11<br>45<br>44                         | 1<br>1<br>1                     |                    |
| 115 | 66 | M | MPN     | STAT5B | c.1924A>C | p.N642H | 17 | JAK2 c.1849G>T, p.V617F<br>SRSF2 c.284C>T, p.P95L<br>FBXW7 c.1394G>A, p.R465H<br>NRAS c.35G>T, p.G12V<br>RUNX1 c.503G>A, p.G168E                                                                            | 47<br>47<br>16<br>4<br>40              | 1<br>1<br>1<br>1<br>2           |                    |
| 116 | 64 | M | ET      | STAT5B | c.1924A>C | p.N642H | 4  | JAK2 c.1849G>T, p.V617F<br>PRPF8 c.4780T>C, p.C1594R                                                                                                                                                        | 24<br>39                               | 1<br>2                          |                    |
| 117 | 49 | M | ET      | STAT5B | c.1924A>C | p.N642H | 3  | JAK2 c.1849G>T, p.V617F                                                                                                                                                                                     | 13                                     |                                 |                    |
| 118 | 76 | M | MN, NOS | STAT5B | c.1924A>C | p.N642H | 41 | RUNX1 c.967+2_967+5del, p.?<br>RUNX1 c.720_730delins10, p.H242fs<br>RUNX1 c.676_677del, p.S226*<br>DNMT3A c.2711C>T, p.P904L                                                                                | 1<br>1<br>8<br>45                      | 1<br>1<br>1<br>1                |                    |

|     |    |   |            |                                                                                                                                                                                                                      |                                      |                                 |                                                                                                                                                                                                                                              |          |
|-----|----|---|------------|----------------------------------------------------------------------------------------------------------------------------------------------------------------------------------------------------------------------|--------------------------------------|---------------------------------|----------------------------------------------------------------------------------------------------------------------------------------------------------------------------------------------------------------------------------------------|----------|
| 119 | 78 | M | MDS-RS-MLD | SF3B1 c.2098A>G, p.K700E                                                                                                                                                                                             | 22                                   | 1                               | 46,XY[20]                                                                                                                                                                                                                                    | Oligo    |
| 120 | 73 | F | MDS-EB2    | ASXL1 c.1934dup, p.G646fs<br>SRSF2 c.283C>A, p.P95T<br>STAG2 c.1044_1047dup, p.A350fs<br>STAG2 c.3205dup, p.T1069fs<br>BCOR c.616_617delinsCCCGGTG, p.F206fs<br>LUC7L2 c.736C>T, p.R246*<br>TET2 c.4121G>A, p.C1374Y | 32<br>36<br>29<br>3<br>3<br>9<br>34  | 1<br>1<br>1<br>1<br>1<br>1<br>2 | 46,XX,r(7)(p?22q?22)[16]                                                                                                                                                                                                                     |          |
| 121 | 58 | M | MDS-SLD    | CALR c.1099_1150del, p.L367fs                                                                                                                                                                                        | 16                                   | 1                               | 46,XX[20]                                                                                                                                                                                                                                    |          |
| 122 | 40 | M | MDS-EB2    | TP53 c.994-2A>G, p.?<br>NRAS c.37G>C, p.G13R<br>IDH2 c.531C>G, p.D177E                                                                                                                                               | 95<br>14<br>11                       | 2<br>2<br>2                     | 46-50,X,-Y,der(5)t(5;15)(q13;q11.2),-9,add(9)(p12),-15,add(20)(q13.3),-21,add(21)(q22),del(21)(q22),-22,+4-8mar,inc[cp14]<br>/94-97,sl,x2[cp5]/46,XY[1]                                                                                      | Negative |
| 123 | 60 | M | MDS-SLD    | DNMT3A c.1758C>A, p.C586*                                                                                                                                                                                            | 2                                    | 1                               | 46,XX[20]                                                                                                                                                                                                                                    |          |
| 124 | 68 | M | MDS-EB2    | SF3B1 c.1998G>T, p.K666N<br>TP53 c.329G>C, p.R110P                                                                                                                                                                   | 1<br>1                               | 1<br>1                          | 53,XY,+1,+4,del(5)(q13q33),+8,+10,+11,+14,+14[3]<br>/54,sl,+15[cp9]/53,sl,-11,+i(11)(q10)[7]/46,XY[1]                                                                                                                                        |          |
| 125 | 77 | M | MDS-MLD    | TP53 c.832C>A, p.P278T                                                                                                                                                                                               | 31                                   | 1                               | 44,XY,add(5)(q13),del(7)(q22),-12,add(16)(q24),-17,-18,-21,-22,i(22)(q10),+2r,+mar[2]/44,sl,t(3;21)(q12;p11.2),add(6)(p21),+12,add(14)(p11.2),add(15)(p11.2),-add(16)(q24),+18,+21,-22,-i(22)(q10),-r[3]/46,XY[2] * Suboptimal mitotic index |          |
| 126 | 80 | F | MDS-EB2    | DDX41 c.3G>A, p.?<br>DDX41 c.1574G>A, p.R525H                                                                                                                                                                        | 45<br>4                              | 1<br>1                          | 46,XX[6]                                                                                                                                                                                                                                     |          |
| 127 | 67 | F | MDS-SLD    |                                                                                                                                                                                                                      |                                      |                                 | 46,XX,del(5)(q13q22)[2]/47,XX,+15[2]/46,XX[17]                                                                                                                                                                                               | Negative |
| 128 | 55 | M | T-MDS      |                                                                                                                                                                                                                      |                                      |                                 | 46,XY,+1,der(1;7)(q10;p10)[11]/46,XY[9]                                                                                                                                                                                                      | Negative |
| 129 | 72 | F | MDS-EB1    | RUNX1 c.292del, p.L98fs                                                                                                                                                                                              | 23                                   | 1                               | 44,XX,add(4)(q25),-5,add(6)(q27),-10,-12,+r[1]/45-47,XX,-2,-3,add(3)(q27),del(5)(q13q33),-7,add(8)(p11.1),-12,-16,add(21)(p11.1),+r,+3-6mar[cp19]                                                                                            |          |
| 130 | 63 | F | MDS-EB2    | SRSF2 c.282_284delinsGCA, p.P95H<br>ASXL1 c.1934dup, p.G646fs<br>TET2 c.2502T>A, p.C834*<br>TET2 c.3781C>T, p.R1261C<br>STAG2 c.1039dup, p.C347fs<br>CEBPA c.68del, p.P23fs<br>CEBPA c.840G>T, p.K280N               | 16<br>16<br>14<br>13<br>13<br>2<br>9 | 1<br>1<br>1<br>1<br>1<br>1<br>2 | 46,XX[6]                                                                                                                                                                                                                                     |          |
| 131 | 72 | M | MDS-EB2    | U2AF1 c.470A>C, p.Q157P<br>TET2 c.3717del, p.L1240fs<br>TP53 c.460G>A, p.G154S                                                                                                                                       | 27<br>2<br>3                         | 1<br>1<br>2                     | 46,XY[20]                                                                                                                                                                                                                                    | Negative |
| 132 | 69 | M | AML-MRC    | ASXL1 c.1934dup, p.G646fs<br>RUNX1 c.705del, p.M236*<br>SRSF2 c.284C>G, p.P95R<br>PHF6 c.117_118insAG, p.A40fs                                                                                                       | 23<br>23<br>26<br>9                  | 1<br>1<br>1<br>1                | 46,XY[20]                                                                                                                                                                                                                                    |          |
| 133 | 73 | F | AML-MRC    | RUNX1 c.485G>C, p.R162T<br>ASXL1 c.1934dup, p.G646fs<br>IDH1 c.394C>T, p.R132C<br>KRAS c.436G>C, p.A146P<br>PHF6 c.875G>A, p.C292Y<br>CBL c.1142G>C, p.C381S                                                         | 27<br>25<br>21<br>4<br>12<br>2       | 1<br>1<br>1<br>1<br>2<br>2      | 46,XX[15]                                                                                                                                                                                                                                    |          |
| 134 | 84 | F | MDS-EB1    | SRSF2 c.281_283dup, p.R94dup<br>RUNX1 c.990delinsAGCCT, p.F330fs<br>STAG2 c.775C>T, p.R259*<br>NRAS c.37G>T, p.G13C<br>NRAS c.35G>A, p.G12D                                                                          | 41<br>42<br>43<br>39<br>5            | 1<br>1<br>1<br>1<br>1           | 46,XX[20]                                                                                                                                                                                                                                    |          |
| 135 | 75 | F | MDS-MLD    | ASXL1 c.1294C>T, p.Q432*<br>RUNX1 c.423_441dup, p.T148fs<br>DNMT3A c.1122+1G>A, p.?<br>IDH2 c.419G>A, p.R140Q<br>EZH2 c.2197T>G, p.Y733D                                                                             | 42<br>21<br>47<br>2<br>80            | 1<br>1<br>1<br>1<br>2           | 47,XX,+8[3]/46,XX[18]                                                                                                                                                                                                                        | Negative |
| 136 | 62 | M | MDS-MLD    | SRSF2 c.284C>T, p.P95L<br>PHF6 c.129dup, p.K44*<br>TET2 c.2746C>T, p.Q916*<br>TET2 c.1211T>A, p.L404*                                                                                                                | 37<br>49<br>73<br>2                  | 1<br>1<br>1<br>1                | 46,XY[20]                                                                                                                                                                                                                                    | Negative |

79 Pts, patients; Dx, diagnosis; VAF: variant allele frequency by %; Tiers: 1, pathogenic/likely pathogenic variants; 2, variant of uncertain significance  
80 (VUS); TCC, T-cell clonality; AML, acute myeloid leukemia; AML-MRC, acute myeloid leukemia with myelodysplasia related changes; MDS,  
81 myelodysplastic syndrome; T-MDS, therapy related myelodysplastic syndrome; MDS/MPN, myelodysplastic/myeloproliferative neoplasm; MPN,  
82 myeloproliferative neoplasm; ET, essential thrombocythemia, CMML, chronic myelomonocytic leukemia; AA, aplastic anemia; T-LGLL, T-cell

83 large granular lymphocytic leukemia; NK-LGLL, chronic NK cells leukemia; T-PLL, T-cell prolymphocytic leukemia; PTLN, post transplant  
84 lymphoproliferative disorder; PBL, plasmablastic lymphoma; B-LBL, B-lymphoblastic leukemia/lymphoma; CLL, chronic lymphocytic  
85 leukemia/small lymphocytic lymphoma; MM, multiple myeloma; DLBCL, diffuse large B cell lymphoma.

86 **Supplemental table 4.** Demographic features of hematologic neoplasm patients with pathogenic *STAT3/5B* variants.

| Diagnosis             | T-LGLL     | NK-LGLL      | Other T-LPD | Other LPD               | T-LGLL + MDS | MN with pathogenic <i>STAT3/5B</i> | MDS with expanded LGL <sup>#</sup> | Summary    |
|-----------------------|------------|--------------|-------------|-------------------------|--------------|------------------------------------|------------------------------------|------------|
| Patient, n            | 46         | 9            | 3           | 8                       | 2            | 50                                 | 18                                 | 135        |
| Sex, M/F              | 32/14*     | 9/0**        | 3/0         | 7/1                     | 2/0          | 26/24                              | 10/8                               | 88/47      |
| Median age, Y (range) | 71 (19-89) | 73 (38 - 85) | 54 (39-69)  | 61 (27-78) <sup>@</sup> | 63 (56-70)   | 70 (22-91)                         | 71 (40-84)                         | 70 (19-91) |

87 M, male; F, female; Y, years; \* P=0.1, T-LGLL vs MN with *STAT3/5B*; \*\* P=0.008 NK-LGLL vs MN with *STAT3/5B*; <sup>@</sup>, P=0.06, other LPD vs T-  
 88 LGLL; <sup>#</sup>, no *STAT3/5B* variants identified by NGS. T-LGLL, T-cell large granular lymphocytic leukemia; NK-LGLL, NK cell large granular  
 89 lymphocytic leukemia or chronic lymphoproliferative disorder of NK cells; LPD, lymphoproliferative disorder; MDS, myelodysplastic syndrome;  
 90 MN, myeloid neoplasm.

91 **Supplementary Figures**

92 **Supplementary figure 1. Dysmyelopoiesis in bone marrow aspirates from patients with NK-LGLL. (a-b)**

93 Bone marrow aspirate smears from a patient with NK-LGLL showed dyserythropoiesis with nuclear membrane  
94 irregularities (arrows, 1000 X magnification). (c) Bone marrow aspirate smears also showed atypical  
95 megakaryocytes with small monolobulated nuclei (arrow, 1000 X magnification). (d) Neoplastic NK cells with  
96 coarse azurophilic granulation (arrow, 1000 X magnification) showed a sinusoidal distribution (e, arrow) with an  
97 atypical megakaryocyte in the background (arrowhead, H&E, 400 X magnification) (f) The neoplastic NK-cells  
98 were highlighted by TIA-1 immunohistochemistry (IHC, 200 X magnification).

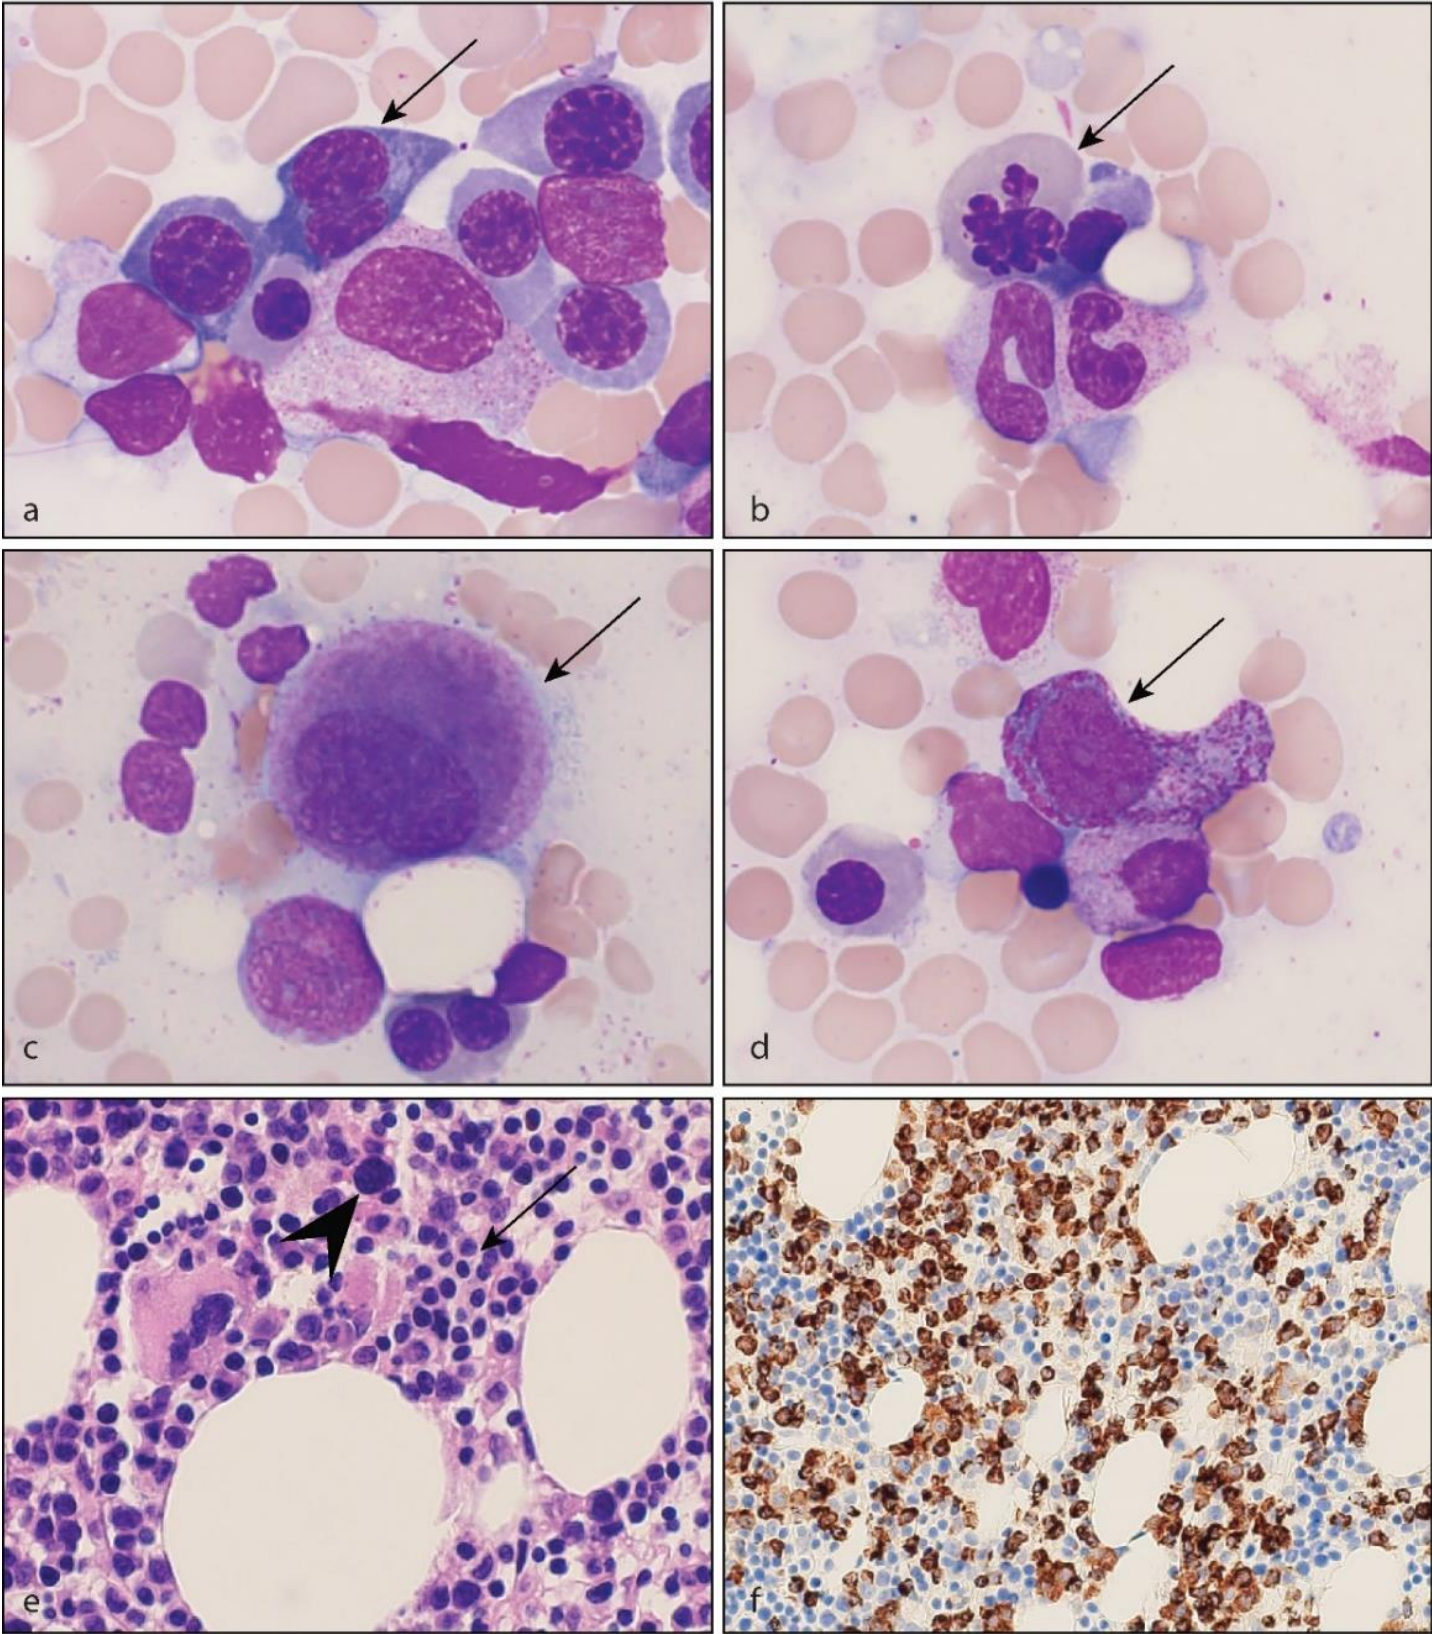

## Supplementary References

- 1 Sandberg, Y. *et al.* BIOMED-2 multiplex immunoglobulin/T-cell receptor polymerase chain reaction protocols can reliably replace Southern blot analysis in routine clonality diagnostics. *J Mol Diagn* **7**, 495-503, doi:10.1016/S1525-1578(10)60580-6 (2005).
- 2 van Dongen, J. J. *et al.* Design and standardization of PCR primers and protocols for detection of clonal immunoglobulin and T-cell receptor gene recombinations in suspect lymphoproliferations: report of the BIOMED-2 Concerted Action BMH4-CT98-3936. *Leukemia* **17**, 2257-2317, doi:10.1038/sj.leu.2403202 (2003).
- 3 Durrani, J. *et al.* Large granular lymphocytic leukemia coexists with myeloid clones and myelodysplastic syndrome. *Leukemia* **34**, 957-962, doi:10.1038/s41375-019-0601-y (2020).
- 4 Shi, M. *et al.* T-cell clones of uncertain significance are highly prevalent and show close resemblance to T-cell large granular lymphocytic leukemia. Implications for laboratory diagnostics. *Mod Pathol* **33**, 2046-2057, doi:10.1038/s41379-020-0568-2 (2020).
- 5 Ohgami, R. S. *et al.* Refining the diagnosis of T-cell large granular lymphocytic leukemia by combining distinct patterns of antigen expression with T-cell clonality studies. *Leukemia* **25**, 1439-1443, doi:10.1038/leu.2011.107 (2011).
- 6 O'Malley, D. P. T-cell large granular leukemia and related proliferations. *Am J Clin Pathol* **127**, 850-859, doi:10.1309/A8FHDA0VVRJ05GJP (2007).
- 7 Morice, W. G. *et al.* Chronic lymphoproliferative disorder of natural killer cells: a distinct entity with subtypes correlating with normal natural killer cell subsets. *Leukemia* **24**, 881-884, doi:10.1038/leu.2009.304 (2010).
- 8 Komrokji, R. S. *et al.* Characterization of myelodysplastic syndromes (MDS) with T-cell large granular lymphocyte proliferations (LGL). *Leukemia* **34**, 3097-3099, doi:10.1038/s41375-020-0928-4 (2020).
- 9 Galli, A. *et al.* Relationship between clone metrics and clinical outcome in clonal cytopenia. *Blood* **138**, 965-976, doi:10.1182/blood.2021011323 (2021).
